# Supplementary material
Source: publisher figshare collection journal article supplement (https://gsapubs.figshare.com/ndownloader/files/34470344)
Supplement: Supplementary file 1 [file 34470344]

| Age | Stratigraphic unit and Geographic location | Sedimentary environment | | Tier position | Ichnoguild | Bauplan | Trophic type | Ichnotaxonomic composition | References |
| --- | --- | --- | --- | --- | --- | --- | --- | --- | --- |
| Middle Triassic (Anisian) | Sunset Prairie Formation (Canada) | Offshore to offshore transition | | Shallow | *Teichichnus-Planolites* | Vagile to semi-vagile | Deposit feeding | *Planolites* isp., *Teichichnus* isp. | Furlong et al. (2018) |
| *Palaeophycus* | Stationary | Suspension feeding or predation | *Palaeophycus* isp. |
| Middle | *Chondrites-Zoophycos* | Stationary | Deposit feeding or chemosymbiosis | *Chondrites* isp., *Zoophycos* isp. |
| *Phycosiphon* | Vagile | Deposit feeding | *Phycosiphon incertum* |
| Middle Triassic (Anisian) | Sunset Prairie Formation (Canada) | Offshore transition | | Shallow | *Teichichnus-Planolites* | Vagile to semi-vagile | Deposit feeding | Planolites isp., Rhizocorallium isp., Teichichnus isp. | Furlong et al. (2018) |
| *Palaeophycus* | Stationary | Suspension feeding or predation | *Palaeophycus* isp. |
| Middle | Rosselia | Stationary | Detritus feeding | Asterosoma isp., Cylindrichnus isp., Rosselia isp. |
| *Skolithos-Diplocraterion* | Stationary | Suspension feeding | Diplocraterion isp., Skolithos isp. |
| *Phycosiphon* | Vagile | Deposit feeding | Phycosiphon incertum |
| Middle Triassic (Anisian-Ladinian) | Bravaisberget Formation (Svalbard) | Prodelta-offshore to delta front- shoreface | | Shallow | *Taenidium-Rhizocorallium* | Vagile to semi-vagile | Deposit feeding | *Taenidium serpentinum,*  *Rhizocoralllium irregulare* | Mørk & Bromley (2008) |
| Middle | *Thalassinoides* | Stationary | Deposit or suspension feeding | *Thalassinoides* cf. *suevicus* |
| Deep | *Chondrites* | Stationary | Deposit feeding or chemosymbiosis | *Chondrites* ispp. |
| Late Triassic (Carnian-Norian) | Mungaroo Formation (Australia) | Upper offshore | | Shallow | *Palaeophycus* | Stationary | Suspension feeding or predation | *Palaeophycus* isp. | Burns (unpublished data) |
| *Asterosoma* | Semi-vagile | Detritus feeding | *Asterosoma* isp. |
| Middle | *Phycosiphon* | Vagile | Deposit feeding | *Phycosiphon incertum* |
| Deep | *Rosselia* | Stationary | Detritus feeding | *Rosselia socialis* |
| Late Triassic (Norian-Rhaetian) | Nayband Formation (Iran) | Offshore transition | | Shallow | *Helminthopsis-Planolites* | Vagile | Deposit to detritus feeding | *Helminthopsis* isp., *Planolites* isp. | Bayet-Goll & Neto de Carvalho (2017) |
| *Gyrochorte-Protovirgularia* | Vagile | Deposit feeding | *Gyrochorte comosa, Protovirgularia rugosa, Protovirgularia* isp. |
| Middle | *Palaeophycus-Bergaueria* | Stationary | Suspension feeding or predation | *Bergaueria* isp.*, B.* cf. *perata, Palaeophycus heberti, P. tubularis, Palaeophycus* isp., *Thalassinoides* isp. |
| *Taenidium-Rhizocorallium* | Vagile to semi-vagile | Deposit feeding | *T. cameronensis*, Taenidium isp., Rhizocorallium jenense |
| Rosselia | Stationary | Detritus feeding | *Cylindrichnus* isp., ?*Rosselia* isp. |
| Deep | *Chondrites-Zoophycos* | Stationary | Deposit feeding or chemosymbiosis | *Chondrites* isp., *Zoophycos* isp. |
| Lower to upper offshore | | Shallow | *Helminthopsis-Planolites* | Vagile | Deposit to detritus feeding | *Helminthopsis* *abeli*, *H. hieroglyphica, Helminthopsis isp., Planolites beverleyensis*, *Planolites* isp. |
| *Gyrochorte-Protovirgularia* | Vagile | Deposit feeding | *Gyrochorte* isp., *Protovirgularia*  isp. |
| Middle | *Teichichnus-Rhizocorallium* | Semi-vagile | Deposit feeding | Teichichnus isp., Rhizocorallium irregulare |
| Deep | *Chondrites-Zoophycos* | Stationary | Deposit feeding or chemosymbiosis | *Chondrites intricatus, Chondrites* isp., *Zoophycos* isp. |
| Late Triassic (Rhaetian) | Blue Lias Formation  Upper “Pre-Planorbis Beds” (England) | Offshore | | Middle | *Arenicolites-Thalassinoides* | Stationary | Suspension feeding | *Arenicolites* isp., *Thalassinoides* isp. | Barras & Twitchett (2007) |
| Early Jurassic (Hettangian) | Cycle 6, Helsingborg Member, Hoganäs Formation (Sweden) | Offshore | | Shallow | *Gyrochorte* | Vagile | Deposit feeding | *Gyrochorte* isp.3 | Pieńkowski (1991) |
| Middle | *Teichichnus-Rhizocorallium* | Semi-vagile | Deposit feeding | *Rhizocorallium* isp.*, Teichichnus* isp. |
| Deep | *Thalassinoides* | Stationary | Deposit or suspension feeding | *Thalassinoides* isp. |
| *Diplocraterion* | Stationary | Suspension feeding | *Diplocraterion* isp. |
| Early Jurassic (Hettangian) | Cycle 7, Helsingborg Member, Hoganäs Formation (Sweden) | Offshore | | Shallow | Unnamed | Vagile | Unknown | Unnamed locomotions trails | Pieńkowski (1991) |
| *Lockeia* | Semi-vagile | Suspension feeding | *Lockeia* isp. |
| Middle | *Teichichnus-Planolites* | Vagile to semi-vagile | Deposit feeding | *Phycodes* isp., *Planolites* isp., *Teichichnus* isp. |
| Deep | *Chondrites* | Stationary | Deposit feeding or chemosymbiosis | *Chondrites* isp. |
| Early Jurassic (Hettangian-Sinemurian) | Kopieniec Formation (Poland) | Offshore | | Shallow | *Asteriacites* | Semi-vagile | Omnivory | *Asteriacites lumbricalis* | Uchman (1991) |
| *Gyrochorte* | Vagile | Deposit feeding | *Gyrochorte* isp.4, *Planolites* isp.5 |
| *Palaeophycus* | Stationary | Suspension feeding or predation | *Palaeophycus ?alternatus, P. ?tubularis* |
| Middle | *Thalassinoides* | Stationary | Deposit or suspension feeding | *Thalassinoides* isp. |
| Early Jurassic (Sinemurian-Pliensbachian) | Neill Klinter Formation (Greenland) | Subtidal sandunes | | Shallow | *Helminthopsis-Cochlichnus* | Vagile | Deposit to detritus feeding | *Cochlichnus anguineus,*  *Helminthopsis magna* | Dam (1990a,b) |
| *Asteriacites* | Stationary | Predation | *Asteriacites lumbricalis* |
| *Gyrochorte-Curvolithus* | Vagile to semi-vagile | Deposit feeding and predation | *Cruziana* isp., *Curvolithus simplex, Gyrochorte comosa, Lockeia siliquaria, Phycosiphon incertum, Planolites beverleyensis, Taenidium serpentinum* |
| *Palaeophycus-Bergaueria* | Stationary | Suspension feeding or predation | *Bargaueria* isp., *Palaeophycus alternatus* |
| *Teichichnus-Phoebichnus* | Semi-vagile | Deposit feeding | *Ancorichnus ancorichnus, Jamesonichnites heimbergi, Phoebichnus trochoides, Phycodes auduni, P. bromleyi, Teichichnus rectus* |
| Middle | *Rhizocorallium* | Semi-vagile | Deposit feeding | *Rhizocorallium irregulare* |
| *Arenicolites* | Stationary | Suspension feeding | *Arenicolites* isp*.* |
| Deep | *Ophiomorpha-Thalassinoides* | Stationary | Suspension feeding | *Ophiomorpha nodosa, Thalassinoides* isp*.* |
| *Diplocraterion* | Stationary | Suspension feeding | *Diplocraterion habichii* |
| Lower shoreface | | Shallow | *Gyrochorte-Curvolithus* | Vagile to semi-vagile | Deposit feeding and predation | *Curvolithus simplex, Gyrochorte comosa, Nereites* isp., *Scolicia* isp., *Taenidium serpentinum* |
| *Gyrophyllites- Parahaentzschelinia* | Semi-vagile | Deposit feeding | *Gyrophyllites kwassicensis, Parahaentzschelinia surliki,* |
| Middle | *Rhizocorallium* | Semi-vagile | Deposit feeding | *Rhizocorallium irregulare* |
| Upper offshore | | Shallow | *Gyrochorte-Curvolithus* | Vagile to semi-vagile | Deposit feeding and predation | *Cruziana* isp., *Curvolithus simplex, Gyrochorte comosa, Planolites beverleyensis, Taenidium serpentinum* |
| *Palaeophycus* | Stationary | Suspension feeding or predation | *Palaeophycus* isp. |
| Middle | *Rhizocorallium* | Semi-vagile | Deposit feeding | *Rhizocorallium irregulare* |
| *Arenicolites* | Stationary | Suspension feeding | *Arenicolites* isp*.* |
| Deep | *Ophiomorpha-Thalassinoides* | Stationary | Suspension feeding | *Ophiomorpha nodosa, Thalassinoides* isp*.* |
| *Diplocraterion* | Stationary | Suspension feeding | *Diplocraterion parallelum* |
| Early Jurassic (Pliensbachian) | Dingy Hill Member (=Kuar Bet Member), Kaladongar Formation (India) | Offshore | | Shallow | *Gordia-Cochlichnus* | Vagile | Deposit to detritus feeding | *Gordia arcuata, Cochlichnus* isp. | Kumar et al. (1982);  Desai (2012);  Joseph et al. (2012);  Desai (2016) |
| *Gyrochorte-Protovirgularia* | Vagile to semi-vagile | Deposit feeding | *Planolites montanus, Lockeia siliquaria, Gyrochorte comosa, Nereites missouriensis, Protovirgularia dichotoma* |
| Middle | *Palaeophycus* | Stationary | Suspension feeding or predation | *Palaeophycus annulatum, P. tubularis, Palaeophycus* isp*.,* |
| *Phycodes* | Semi-vagile | Deposit feeding | *Phycodes circinnatum, P. palmatum* |
| *Thalassinoides* | Stationary | Deposit or suspension feeding | *Gyrolithes* isp., *Thalassinoides suevicus, Thalassinoides* isp*.* |
| *Rhizocorallium* | Semi-vagile | Deposit feeding | *Rhizocorallium jenense, Rhizocorallium irregulare* |
| Deep | *Asterosoma-Dactylophycus* | Semi-vagile | Deposit or detritus feeding | *Dactylophycus* isp., *Asterosoma ludwigae* |
| *Chondrites* | Stationary | Deposit feeding or chemosymbiosis | *Chondrites intricatus, Chondrites targionii* |
| Early to Middle Jurassic (Sinemurian-Aalenian) | Plover Formation (Australia) | Upper offshore | | Shallow | *Planolites* | Vagile | Deposit feeding | *Planolites montanus* | Buatois et al. (2013, 2016); Burns et al. (2013); Buatois (unpublished data) |
| *Asterosoma* | Semi-vagile | Detritus feeding | *Asterosoma* isp. |
| Middle | *Cylindrichnus-Rosselia* | Stationary | Detritus feeding | *Cylindrichnus concentricus*, *Rosselia socialis* |
| *Palaeophycus-Schaubcylindrichnus* | Stationary | Suspension feeding or predation | *Palaeophycus tubularis*, *P. heberti*, *Schaubcylindrichnus coronus, Thalassinoides* isp. |
| *Teichichnus* | Semi-vagile | Deposit feeding | *Teichichnus rectus* |
| *Siphonichnus* | Stationary | Suspension feeding | *Siphonichnus eccacensis,* undetermined vertical burrow |
| Deep | *Phycosiphon-Chondrites* | Vagile to stationary | Deposit feeding or chemosymbiosis | *Phycosiphon incertum, Chondrites* isp. |
| Lower offshore | | Shallow | *Planolites* | Vagile | Deposit feeding | *Planolites montanus* |
| Middle | *Asterosoma* | Semi-vagile | Detritus feeding | *Asterosoma* isp. |
| *Cylindrichnus-Rosselia* | Stationary | Detritus feeding | *Cylindrichnus concentricus*, *Rosselia socialis* |
| *Palaeophycus-Thalassinoides* | Stationary | Suspension feeding or predation | *Palaeophycus heberti*, *Thalassinoides* isp. |
| *Teichichnus* | Semi-vagile | Deposit feeding | *Teichichnus rectus* |
| *Zoophycos-Trichichnus* | Stationary | Deposit feeding or chemosymbiosis | *Zoophycos* isp., *Trichichnus linearis* |
| Deep | *Phycosiphon-Chondrites* | Vagile to stationary | Deposit feeding or chemosymbiosis | *Phycosiphon incertum, Chondrites* isp. |
| Early to Middle Jurassic (Toarcian-Bathonian) | Bardas Blancas Formation (Argentina) | Offshore transition | | Shallow | *Gordia* | Vagile | Deposit to detritus feeding | *Gordia* isp. | Bressan & Palma (2009); Schwarz et al. (2021) |
| *Gyrochorte-Lockeia* | Vagile to semi-vagile | Deposit feeding | *Gyrochorte* isp., *Lockeia* isp. |
| *Teichichnus-Planolites* | Vagile to semi-vagile | Deposit feeding | *Planolites* isp., *Teichichnus rectus*., *Taenidium serpentinum*, *Taenidium* isp., *Phycosiphon* isp. |
| *Palaeophycus* | Stationary | Suspension feeding or predation | *Palaeophycus tubularis, Palaeophycus* isp. |
| Middle | Rosselia | Stationary | Detritus feeding | Rosselia isp. |
| *Thalassinoides* | Stationary | Deposit or suspension feeding | *Thalassinoides* isp. A, *Thalassinoides* isp. B |
| Deep | *Rhizocorallium* | Semi-vagile | Deposit feeding | *Rhizocorallium* isp. |
| *Chondrites-Zoophycos* | Stationary | Deposit feeding or chemosymbiosis | *Chondrites* isp.*, Zoophycos* isp. |
| Upper offshore | | Shallow | *Helminthopsis* | Vagile | Deposit to detritus feeding | *Helminthopsis* isp. |
| *Teichichnus-Planolites* | Vagile to semi-vagile | Deposit feeding | *Planolites* isp., *Teichichnus* *rectus*, *Phycosiphon* isp. |
| Middle | *Skolithos* | Stationary | Suspension feeding | Skolithos isp. |
| Deep | *Rhizocorallium* | Semi-vagile | Deposit feeding | *Rhizocorallium* isp. |
| *Chondrites-Zoophycos* | Stationary | Deposit feeding or chemosymbiosis | *Chondrites* isp.*, Zoophycos* isp. |
| Lower offshore | | Shallow | *Phycosiphon* | Vagile | Deposit feeding | *Phycosiphon* isp. |
| Middle | *Scolicia* | Vagile | Deposit feeding | *Scolicia* isp. |
| Deep | *Chondrites-Zoophycos* | Stationary | Deposit feeding or chemosymbiosis | *Chondrites* isp.*, Zoophycos* isp. |
| Middle Jurassic  (late Aalenian - Bajocian) | Lajas Formation (Argentina) | Upper Offshore | | Shallow | *Curvolithus* | Vagile | Predation | *Curvolithus simplex* | Canale et al. (2020) |
| *Protovirgularia-Planolites* | Vagile | Deposit feeding | *Protovirguaria* isp., *Planolites* isp. |
| Middle | *Nereites* | Vagile | Deposit feeding | *Nereites* isp. |
| *Asterosoma* | Stationary | Detritus feeding | *Asterosoma* isp. |
| *Teichichnus* | Semi-vagile | Deposit feeding | *Teichichnus* isp. |
| Deep | *Thalassinoides* | Stationary | Deposit or suspension feeding | *Thalassinoides suevicus* |
| *Chondrites* | Stationary | Deposit feeding or chemosymbiosis | *Chondrites* isp. |
| Midle Jurassic (Bathonian) | “Gnaszyn” clay-pit (Poland) | Lower offshore | | Shallow | *Planolites* | Vagile | Deposit feeding | *Planolites* isp. | Leonowicz (2012) |
| *Palaeophycus* | Stationary | Suspension feeding or predation | *Palaeophycus* isp. |
| Middle | *Thalassinoides* | Stationary | Suspension feeding | *Thalassinoides* isp*.* |
| Deep | *Chondrites-Trichichnus* | Stationary | Deposit feeding to chemosymbiosis | *Chondrites* isp*., Trichichnus* isp*.* |
| Midle Jurassic (Bathonian) | Upper interval, Czéstochowa Clay Formation (Poland) | Lower offshore | | Shallow | *Planolites* | Vagile | Deposit feeding | *Planolites* isp. | Leonowicz (2015) |
| *Palaeophycus* | Stationary | Suspension feeding or predation | *Palaeophycus* isp. |
| *Thalassinoides* | Stationary | Suspension feeding | *Thalassinoides* isp*.* |
| Middle | *Schaubcylindrichnus* | Stationary | Suspension feeding or predation | *Schaubcylindrichnus* isp*.* |
| *Taenidium* | Vagile | Deposit feeding | *Taenidium* isp. |
| Deep | *Chondrites-Trichichnus* | Stationary | Deposit feeding to chemosymbiosis | *Chondrites* isp*. Trichichnus* isp*.* |
| Middle Jurassic (Bajocian) | Kaladongar Sandstone Member, Kaladongar Formation (India) | Mixed siliciclastic-carbonate offshore environment | | Shallow | *Planolites* | Vagile | Deposit feeding | *Planolites beverleyensis* | Joseph et al. (2012) |
| Middle | *Teichichnus- Rhizocorallium* | Semi-vagile | Deposit feeding | *Rhizocorallium irregulare, R. uliarensis, Teichichnus rectus* |
| Deep | *Skolithos-Arenicolites* | Stationary | Suspension feeding | *Arenicolites* cf*. carbonarius,*  *Skolithos linearis* |
| Middle Jurassic (Bajocian) | Babia Cliff Member,  Kaladongar Formation (India) | Mixed siliciclastic-carbonate offshore environment | | Shallow | *Gordia-Planolites* | Vagile | Deposit to detritus feeding | *Gordia* isp*., Planolites beverleyensis* | Fürsich (1998);  Joseph et al. (2012) |
| *Gyrochorte-Ancorichnus* | Vagile to semi-vagile | Deposit feeding | *Ancorichnus ancorichnus, Gyrochorte comosa, Lockeia siliquaria, Lockeia* isp*.* |
| Middle | *Palaeophycus* | Stationary | Suspension feeding or predation | *Palaeophycus* isp. |
| *Asterosoma- Phycodes* | Semi-vagile | Deposit or detritus feeding | *Asterosoma ludwigae, Phycodes* isp*.* |
| *Teichichnus-Rhizocorallium* | Semi-vagile | Deposit feeding | *Rhizocorallium irregulare, R. uliarensis, Teichichnus* isp. |
| *Arenicolites-Diplocraterion* | Stationary | Suspension feeding | *Arenicolites* cf*. carbonarius, Diplocraterion habichii, D. parallelum* |
| Deep | *Ophiomorpha-Thalassinoides* | Stationary | Suspension feeding | *Ophiomorpha nodosa, Thalassinoides* isp*.* |
| Middle Jurassic (Bajocian) | Joyan Member, Jaisalmer Formation (India) | Offshore | | Shallow | *Asteriacites* | Stationary | Predation | *Asteriacites lumbricalis* | Pandey et al. (2012);  Pandey et al. (2014);  Gurav et al. (2014) |
| *Gyrochorte-Protovirgularia* | Vagile to semi-vagile | Deposit feeding | *Gyrochorte comosa, G. variabilis, Taenidium serpentinum, Lockeia siliquaria, Protovirgularia rugosa,*  *Protovirgularia* isp. |
| *Palaeophycus* | Stationary | Suspension feeding or predation | *Palaeophycus striatus* |
| Middle | *Rhizocorallium* | Semi-vagile | Deposit feeding | *Rhizocorallium commune,*  *Rhizocorallium* isp. |
| Rosselia | Stationary | Detritus feeding | *Rosselia socialis, Rosselia* isp. |
| *Thalassinoides-Diplocraterion* | Stationary | Suspension feeding | *Thalassinoides* isp.,  *Diplocraterion parallelum* |
| Deep | *Chondrites* | Stationary | Deposit feeding or chemosymbiosis | *Chondrites intricatus* |
| Middle Jurassic  (Bathonian) | Fort Member, Jaisalmer Formation (India) | Storm influenced shoreface to offshore transition | | Shallow | *Lockeia* | Stationary | Suspension feeding | *Lockeia siliquaria* | Kulkarni et al. (2008);  Pandey et al. (2012);  Pandey et al. (2014) |
| *Taenidium-Planolites* | Vagile | Deposit feeding | *Taenidium serpentinum, Planolites* isp. |
| Middle | *Rhizocorallium - Thalassinoides* | Stationary to semi-vagile | Deposit feeding or suspension feeding | *Rhizocorallium jenense, R. irregulare, Thalassinoides suevicus, Thalassinoides* isp., *Palaeophycus tubularis, P. striatus* |
| Deep | *Skolithos-Polykladichnus* | Stationary | Suspension feeding | *Skolithos linearis, Polykladichnus irregularis, Arenicolites tenuis* |
| *Asterosoma* | Semi-vagile | Deposit-feeding | *Asterosoma ludwigae, Asterosoma* isp*., Phycodes* isp*.* |
| Offshore affected by storm-induced currents | | Shallow | *Planolites* | Vagile | Deposit feeding | *Planolites beverleyensis* | Fürsich et al. (2018) |
| *Palaeophycus* | Stationary | Suspension feeding or predation | *Palaeophycus* isp*.* |
| Middle | *Teichichnus-Taenidium-Bolonia* | Semi-vagile to vagile | Deposit feeding | *Taenidium serpentinum, T.* cf*. diesingi, Parahaentzschelinia ottoi8, Gyrophyllites geryonides,*  *Bolonia lata, Ancorichnus* isp*., Teichichnus* cf. *patens, ?Teichichnus rectus* |
| Deep | *Ophiomorpha-Thalassinoides* | Stationary | Suspension feeding | *Thalassinoides suevicus, Thalassinoides* isp*.*,  *Ophiomorpha nodosa, O. irregulaire* |
| Middle Jurassic  (Bathonian) | Hadibhadang Sandstone Member,  Khadir Formation (India) | Upper offshore | | Shallow | *Curvolithus-Gyrochorte* | Vagile | Predation or deposit feeding | *Curvolithus* isp*., Gyrochorte comosa, Didymaulichnus lyelli* | Fürsich (1998);  Darngwan et al. (2018);  Srivastava et al. (2010);  Desai (2016) |
| *Lockeia* | Stationary | Suspension feeding | *Lockeia siliquaria* |
| *Taenidium-Planolites* | Vagile to semi-vagile | Deposit feeding | *Planolites beverleyensis, Halopoa imbricata, Taenidium serpentinum, Teichichnus rectus, Trichophycus venosus* |
| *Palaeophycus* | Stationary | Suspension feeding or predation | *Palaeophycus tubularis* |
| Middle | *Hillichnus-Rhizocorallium* | Vagile to semi-vagile | Deposit feeding | *Rhizocorallium jenense, R. commune* var*. irregulare, Hillichnus lobosensis,*  *Protovirgularia* isp. |
| *Parahaentzschelinia* | Vagile | Deposit feeding | *Parahaentzschelinia ottoi8* |
| Deep | *Skolithos-Arenicolites* | Stationary | Suspension feeding | *Skolithos linearis, S. verticalis, Skolithos* isp*., Arenicolites carbonarius* |
| *Asterosoma-Thalassinoides* | Stationary to semi-vagile | Deposit or suspension feeding | *Asterosoma* isp*. Thalassinoides horizontalis, T. paradoxicus, T. suevicus* |
| Middle Jurassic  (Bathonian) | Badabag Member, Jaisalmer Formation (India) | Offshore transition to upper offshore | | Shallow | *Gyrochorte-Ancorichnus* | Vagile | Deposit feeding | *Ancorichnus ancorichnus, Planolites beverleyensis, Gyrochorte variabilis* | Kumar (1979);  Fürsich et al. (1992);  Fürsich et al. (2006);  Pandey et al. (2014);  Paranjape et al. (2013);  Desai (unpublished data) |
| *Lockeia-Protovirgularia* | Vagile | Deposit feeding | *Lockeia siliquaria, Lockeia* isp*. Protovirgularia rugosa, P. bidirectionalis, Protovirgularia* isp*., Ptychoplasma vagans* |
| *Zoophycos* | Vagile | Deposit feeding or chemosymbiosis | *Zoophycos insignis, Z. scoparious, Z. villae* |
| *Thalassinoides* | Stationary | Deposit feeding or suspension feeding | *Thalassinoides suevicus,* |
| Middle | *Thalassinoides-Palaeophycus* | Stationary | Suspension feeding or predation | *Thalassinoides suvicus, Palaeophycus striatus, P. tubularis* |
| *Asterosoma* | Semi-vagile | Detritus feeding | *Asterosoma ludwigae, A. striata* |
| Deep | *Ophiomorpha-Skolithos* | Stationary | Suspension feeding | *Ophiomorpha nodosa, Ophiomorpha* isp., *Skolithos linearis* |
| *Taenidium-Rhizocorallium* | Vagile to semi-vagile | Deposit feeding | *Taenidium cameroensis,*  *Rhizocorallium jenense, R. irregulare* |
| *Chondrites* | Stationary | Deposit feeding or chemosymbiosis | *Chondrites intricatus* |
| Middle Jurassic  (Callovian) | Nara Member, Wastawah Formation (India) | Upper offshore | | Shallow | *Rosselia* | Stationary | Detritus feeding | *Rosselia socialis, Rosselia* isp*.* | [Shringarpure](https://shodhganga.inflibnet.ac.in/jspui/browse?type=author&value=Shringarpure%2CD+M) (1985);  Desai (unpublished data);  Fürsich (1998);  Joseph et al. (2020);  Ghare and Kulkarni (1986);  Kulkarni and Ghare (1989, 1991) |
| *Skolithos* | Stationary | Suspension feeding | *Skolithos verticalis, Arenicolites variabilis, Diplocraterion parallelum* |
| Middle | *Thalassinoides* | Stationary | Suspension feeding | *Thalassinoides paradoxicus, T. suevicus, Thalassinoides* isp*., Ophiomorpha* isp*.* |
| Deep | *Chondrites* | Stationary | Deposit feeding or chemosymbiosis | *Chondrites intricatus* |
| Kharol Member,  Wastawah Formation (India) | Offshore transition | | Shallow | *Curvolithus* | Vagile | Predation | *Curvolithus multiplex* |
| *Gyrochorte-Protovirgularia* | Vagile | Deposit feeding | *Gyrochorte comosa, G. robusta, Protovirguaria* isp., *Psammichnites* isp., *Planolites beyerleyensis* |
| Middle | *Rhizocorallium- Polykladichnus* | Stationary to semi-vagile | Deposit feeding | *Rhizocorallium jenense, Polykladichnus aragonesis, P. irregularis* |
| *Skolithos-Solemyatuba* | Stationary | Suspension feeding | *Skolithos linearis, Solemyatuba subcompressa* 6 |
| Deep | *Thalassinoides* | Stationary | Deposit or suspension feeding | *Thalassinoides paradoxicus, T. Suevicus* |
| *Chondrites* | Stationary | Deposit feeding or chemosymbiosis | *Chondrites intricatus, C. targionii* |
| Middle Jurassic  (Callovian) | Member III, Jumara Formation (India) | | Offshore transition | Shallow | *Bergaueria* | Stationary | Suspension-feeding or predation | *Bergaueria* isp*.* | Desai (2016); Desai (unpublished)  Fürsich (1998);  Patel and Patel (2015);  Solanki et al. (2017) |
| *Lockeia-Protovirgularia* | Vagile to semi-vagile | Deposit feeding | *Lockeia* isp*., Protovirgularia* isp*.* |
| Middle | *Taenidium* | Vagile | Deposit feeding | Taenidium isp. |
| *Arenicolites* | Stationary | Suspension feeding | Arenicolites isp. |
| *Palaeophycus* | Stationary | Suspension feeding or predation | *Palaeophycus tubularis, P. striatus* |
| Deep | *Ophiomorpha* | Stationary | Suspension feeding | *Ophiomorpha nodosa Ophiomorpha* isp. |
| Member II, Jumara Formation (India) | | Upper to lower offshore | Shallow | *Curvolithus-Gyrochorte* | Vagile | Predation to deposit feeding | *Curvolithus* isp*., Gyrochorte comosa, G. robusta, Didymaulichnus* isp. | Desai (2016); Desai (unpublished)  Fürsich (1998);  Patel et al. (2008)  Patel and Patel (2015);  Solanki et al. (2017) |
| *Palaeophycus* | Stationary | Suspension feeding or predation | *Palaeophycus tubularis Palaeophycus striatus Palaeoephycus annulatus Biformites* isp. |
| *Scolicia-Ancorichnus* | Vagile | Deposit feeding | *Scolicia cutchensis, S. prisca, Ancorichnus ancorichnus, Nereites* isp*., Dendrotichnium* isp., *Circulichnus* isp., *Imponoglyphus* isp. |
| Middle | *Rhizocorallium-Spongeliomorpha* | Stationary to semi-vagile | Deposit feeding | *Rhizocorallium jenense, R. irregulare, Spongeliomorpha oraviensis, S. sublumbricosta Parahantzschelinia ardelia, Arenituba* isp. |
| *Teichichnus-Phoebichnus* | Semi-vagile | Deposit feeding | *Teichichnus rectus, Phoebichnus* isp. |
| *Ophiomorpha-Thalassinoides* | Stationary | Suspension feeding | *Ophiomorpha nodosa, Thalassinoides suevicus, Gyrolithes* isp. |
| Deep | *Chondrites-Zoophycos* | Stationary | Deposit feeding or chemosymbiosis | *Chondrites intricatus, C. targionii, C. patulus, Zoophycos briantieus, Z. scoparius, Z. funiculatus, Z. villae, Phymatoderma granulatus* |
| Member I, Jumara Formation (India) | | Upper Offshore | Shallow | *Helmithoidichnites-Cochlichnus* | Vagile | Deposit to detritus feeding | *Helmithoidichnites tenuis,*  *Cochlichnus anguineus* | Desai (2016); Desai (unpublished)  Fürsich (1998);  Patel and Patel (2015);  Solanki et al. (2017) |
| *Planolites* | Vagile | Deposit feeding | *Planolites montanus, P. beverleyensis* |
| *Skolithos* | Stationary | Suspension-feeding | *Skolithos linearis, S. linearis, Arenicolites variabilis, Arenicolites* isp*., Laevicyclus mongraensis, Diplocraterion* isp. |
| *Bergaueria* | Stationary | Suspension-feeding or predation | *Bergaueria* isp*., Laevycyclus mongranensis* |
| *Rhizocorallium* | Semi-vagile | Deposit feeding | *Rhizocorallium jenense* |
| Middle | *Teichichnus-Phoebichnus* | Semi-vagile | Deposit feeding | *Teichichnus rectus, Phoebichnus* isp. |
|  | *Ophiomorpha-Thalassinoides* | Stationary | Suspension feeding | *Thalassinoides suevicus, Ophiomorpha nodosa, Gyrolithes* isp. |
| Deep | *Chondrites* | Stationary | Deposit feeding to chemosymbiosis | *Chondrites intricatus, C. recurves, Chondrites* isp*. Trichichnus* isp*.*  *Glockerichnus* isp. |
| Middle to Late Jurassic (Callovian – Oxfordian) | Kuldhar Member, Jaisalmer Formation  (India) | | Offshore transition | Shallow | *Palaeophycus* | Stationary | Suspension feeding or predation | *Palaeophycus striatus* | Pandey et al. (2014);  Desai (unpublished data);  Fürsich et al. (2006) |
| *Ctenopholeus* | Vagile | Deposit feeding or predation | *Ctenopholeus kutcheri* |
| Middle | *Asterosoma* | Semi-vagile | Deposit feeding | *Asterosoma coxii, A. ludwigae,*  *Trichophycus* isp., *Teichichnus rectus* |
| *Rhizocorallium - Thalassinoides* | Stationary to semi-vagile | Deposit feeding | *Rhizocorallium ulariensis, R. irregulaire, R. jenense, Thalassinoides* isp. |
| Deep | *Zoophycos* | Stationary | Deposit feeding or chemosymbiosis | *Zoophycos briantius, Z. scoparious* |
| Middle to Late Jurassic (Callovian –Oxfordian) | Gangta Member,  Khadir Formation (India) | | Offshore transition | Shallow | *Cochlichnus* | Vagile | Deposit feeding | *Cochlichnus anguineus* | Desai (unpublished data);  Patel et al. (2012) |
| *Curvolithus-Protovirgularia* | Vagile | Deposit feeding or predation | *Curvolithus multiplex, C. simplex, Protovirgularia dichotoma,*  *Protovirgularia* isp., *Lockeia siliquaria*7*, Scolicia prisca, Planolites beverleyensis, P. montanus, Didymaulichnus lyelli* |
| *Palaeophycus* | Stationary | Suspension feeding or predation | *Palaeophycus tubularis, P. heberti* |
| Middle | *Rhizocorallium-Thalassinoides* | Stationary to semi-vagile | Deposit feeding | *Rhizocorallium jenense, R. irregulare, Thalassinoides horizontalis, T. suevicus* |
| *Glockerichnus* isp., | Semi-vagile | Deposit feeding | *Glockerichnus* isp., |
| Deep | *Skolithos* | Stationary | Suspension feeding | *Skolithos linearis, Arenicolites sparsus, Laevicyclus mongranensis* |
| *Chondrites* | Stationary | Deposit feeding- chemosymbiosis | *Chondrites targionii, C. stellaris, Chondrites* isp., *Pilichnus dichotoma* |
| Late Jurassic (Oxfordian) | Jajiya Member, Jaisalmer Foramtion  (India) | | Upper offshore | Shallow | *Taenidium* | Vagile | Deposit feeding | *Taenidium* isp. | Pandey et al. (2014);  Desai (unpublished data) |
| Middle | *Thalassinoides* | Stationary | Deposit or suspension feeding | *Thalassinoides* isp. |
| Deep | *Zoophycos* | Stationary | Deposit feeding- chemosymbiosis | *Zoophycos briantius, Zoophycos* isp. |
| Late Jurassic  (Oxfordian) | Dhosa Oolite Member, Jumara Formation (India) | | Lower offshore | Shallow | *Rhizocorallium* | Semi-vagile | Deposit feeding | *Rhizocorallium jenense, R. irregulare* | Desai (unpublished data);  Fürsich (1998);  Patel et al. (2009);  Solanki et al. (2017);  Kulkarni and Borkar (2000); Gayakvad & Solanki (2021) |
| *Skolithos-Palaeophycus* | Stationary | Suspension feeding or predation | *Skolithos verticalis, Palaeophycus tubularis* |
| Middle | *Zoophycos* | Stationary | Deposit feeding or chemosymbiosis | *Zoophycos brianteus, Z. circinnatus, Z. funiculatus, Z. laminatus, Z. insignis, Z. scoparius, Z. villae* |
| Deep | *Phycodes*-*Taenidium* | Vagile to semi-vagile | Deposit feeding | *Phycodes* isp*., Taenidium cameronensis* |
| *Thalassinoides* | Stationary | Deposit or suspension feeding | *Thalassinoides suevicus* |
| *Chondrites* | Stationary | Deposit feeding or chemosymbiosis | *Chondrites intricatus, C. Targionii* |
| Late Jurassic  (Oxfordian) | Kanthkote Member, Wagad Sandstone (India) | | Offshore transition | Shallow | *Gyrochorte-Ancorichnus* | Vagile | Deposit feeding | *Ancorichnus* isp., *Gyrochorte comosa* | [Shringarpure](https://shodhganga.inflibnet.ac.in/jspui/browse?type=author&value=Shringarpure%2CD+M) (1985);  Fürsich (1998);  Desai (2018)  Joseph et al. (2020);  Alberti et al. (2013);  Desai (unpublished data);  Ghare and Kulkarni (1986);  Kulkarni and Ghare (1989, 1991); Kumar et al. (1982) |
| *Palaeophycus* | Stationary | Suspension feeding or predation | *Palaeophycus tubularis* |
| Middle | *Polykladichnus* | Stationary | Suspension or deposit feeding | *Arenicolites* isp., *Polykladichnus irregularis, Ophiomorpha nodosa,*  *Diplocraterion* isp. |
| Deep | *Rhizocorallium-Thalassinoides* | Stationary to semi-vagile | Deposit feeding | *Rhizocorallium irregulare, R. jenense, Thalassinoides suevicus,*  *T. paradoxicus* |
| *Cylindrichnus* | Stationary | Detritus feeding | *Cylindrichnus* isp. |
| *Chondrites* | Stationary | Deposit feeding or chemosymbiosis | *Chondrites intricatus* |
| Late Jurassic  (Oxfordian) | “Argiles de Saïda” Formation (Algeria) | | Lower shoreface to upper offshore | Shallow | *Archaeonassa-Cruziana* | Vagile | Deposit feeding | *Archaeonassa* isp.*, Cruziana problematica* | Cherif et al. (2018) |
| *Lockeia-Protovirgularia* | Vagile to semi-vagile | Deposit feeding | *Lockeia* isp., *Protovirgularia* isp. |
| *Taenidium-Planolites* | Vagile | Deposit feeding | *Taenidium barretti* |
| *Palaeophycus* | Stationary | Suspension feeding or predation | *Palaeophycus* isp. |
| Middle | *Rhizocorallium* | Semi-vagile | Deposit feeding | *Rhizocorallium* isp. |
| Deep | *Thalassinoides* | Stationary | Deposit or suspension feeding | *Thalassinoides* isp., *Spongeliomorpha* isp. |
| Late Jurassic  (Oxfordian) | Argiles Rouges, Kheneg Formation (Algeria) | | Offshore transition to lower offshore | Shallow | *Helminthopsis* | Vagile | Deposit to detritus feeding | *Helminthopsis* isp. | Belaid et al. (2020) |
| *Belorhaphe-Megagrapton* | Stationary | Farming | *Belorhaphe zickzack, Megagrapton irregulare* |
| *Nereites-Protovirgularia* | Vagile | Deposit feeding | *Nereites irregularis, Nereites* isp.*, Planolites* isp.*, Protovirgularia* isp. |
| Middle | *Palaeophycus-Bergaueria* | Stationary | Suspension feeding or predation | *Bergaueria* isp.*, Palaeophycus* isp. |
| *Chondrites* | Stationary | Deposit feeding or chemosymbiosis | *Chondrites* isp. |
| Deep | *Ophiomorpha-Thalassinoides* | Stationary | Suspension feeding | *Ophiomorpha rudis, Ophiomorpha* isp*., Thalassinoides* isp*.* |
| Late Jurassic  (Oxfordian) | Corallian (England) | | Offshore | Shallow | *Planolites* | Vagile | Deposit feeding | *Planolites* isp. | Fürsich (1975) |
| *Taenidium-Rhizocorallium* | Vagile to semi-vagile | Deposit feeding | *Taenidium* isp.9*,*  *Rhizocoralllium irregulare* |
| Middle | *Cylindrichnus* | Stationary | Detritus feeding | *Cylindrichnus* isp. |
| Deep | *Thalassinoides* | Stationary | Deposit or suspension feeding | *Thalassinoides suevicus*10. |
| *Arenicolites-Diplocraterion* | Stationary | Suspension feeding | *Arenicolites* isp., *Diplocraterion* isp. |
| *Chondrites* | Stationary | Deposit feeding or chemosymbiosis | *Chondrites* isp. |
| Late Jurassic  (Oxfordian-Kimmeridgian) | Ula Formation (Norway) | | Lower offshore | Shallow | *Helminthopsis-Planolites* | Vagile | Deposit to detritus feeding | *Helminthopsis* isp., *Planolites* isp. | Baniak et al. (2014) |
| *Nereites* | Vagile | Deposit feeding | *Nereites missouriensis*11 |
| Middle | *Schaubcylindrichnus* | Stationary | Suspension feeding or predation | *Schaubcylindrichnus freyi* |
| Deep | *Teichichnus* | Semi-vagile | Deposit feeding | *Teichichnus rectus* |
| *Chondrites* | Stationary | Deposit feeding or chemosymbiosis | *Chondrites* isp. |
| Upper offshore | Shallow | *Phycosiphon* | Vagile | Deposit feeding | *Phycosiphon incertum* |
| Rosselia | Stationary | Detritus feeding | Asterosoma isp., Rosselia isp. |
| Middle | *Diplocraterion* | Stationary | Suspension feeding | *Diplocraterion* isp. |
| *Thalassinoides* | Stationary | Deposit or suspension feeding | *Thalassinoides* isp. |
| Deep | *Teichichnus* | Semi-vagile | Deposit feeding | *Teichichnus rectus* |
| *Chondrites* | Stationary | Deposit feeding or chemosymbiosis | *Chondrites* isp. |
| Lower shoreface | Shallow | *Phycosiphon-Planolites* | Vagile | Deposit feeding | *Phycosiphon incertum, Planolites* isp. |
| *Palaeophycus* | Stationary | Suspension feeding or predation | *Palaeophycus* isp. |
| Asterosoma | Stationary | Detritus feeding | Asterosoma isp. |
| Middle | *Thalassinoides* | Stationary | Deposit or suspension feeding | *Thalassinoides* isp. |
| Deep | *Teichichnus* | Semi-vagile | Deposit feeding | *Teichichnus zigzag* |
| Late Jurassic  (Oxfordian-Kimmeridgian) | Fulmar Formation (England) | | Lower offshore | Shallow | *Phycosiphon-Planolites* | Vagile | Deposit feeding | *Phycosiphon incertum*12*, Planolites* isp. | Martin and Pollard (1996); Goldring et al. (2005) |
| Middle | *Schaubcylindrichnus* | Stationary | Suspension feeding or predation | *Schaubcylindrichnus freyi* |
| *Teichichnus* | Semi-vagile | Deposit feeding | *Teichichnus rectus* |
| Deep | *Chondrites* | Stationary | Deposit feeding or chemosymbiosis | *Chondrites* isp. |
| Upper offshore | Middle | *Phycosiphon* | Vagile | Deposit feeding | *Phycosiphon incertum*12 |
| Deep | *Chondrites* | Stationary | Deposit feeding or chemosymbiosis | *Chondrites* isp. |
| Offshore transition | Shallow | *Planolites-Phycosiphon* | Vagile | Deposit feeding | *Phycosiphon incertum*12*, Planolites* isp. |
| Middle | *Cylindrichnus* | Stationary | Detritus feeding | *Cylindrichnus concentricus* |
| *Schaubcylindrichnus-Siphonichnus* | Stationary | Suspension feeding or predation | *Schaubcylindrichnus freyi, Siphonichnus eccacensis* |
| *Thalassinoides* | Stationary | Deposit or suspension feeding | *Thalassinoides* isp. |
| *Teichichnus-Phoebichnus* | Semi-vagile | Deposit feeding | *Phoebichnus trochoides, Rhizocorallium* isp., *Teichichnus rectus* |
| *Chondrites-Zoophycos* | Stationary | Deposit feeding or chemosymbiosis | *Chondrites* isp., *Zoophycos* isp. |
| Deep | *Diplocraterion* | Stationary | Suspension feeding | *Diplocraterion habichii* |
| *Teichichnus* | Semi-vagile | Deposit feeding | *Teichichnus zigzag* |
| Late Jurassic  (Kimmeridgian) | Lower Member,  Jhuran Formation (India) | | Offshore transition | Shallow | *Helminthopsis-Cochlichnus* | Vagile | Deposit to detritus feeding | *Cochlichnus anguineus,*  *Helminthopsis abeli, H. tenuis* | Badve and Ghare, 1978;  Desai, 2016, Desai et al, 2008,  Howard and Singh, 1985  Chiplonkar, 1980,  Kumar et al, 1982 |
| *Curvolithus-Gyrochorte* | Vagile | Deposit feeding or predation | *Curvolithus simplex, C. multiplex,*  *Gyrochorte comosa, G. robusta, Gyrochorte* isp. |
| Middle | *Palaeophycus* | Stationary | Suspension feeding or predation | *Palaeophycus tubularis, P. striatus* |
| *Phycodes-Planolites* | Vagile to semi-vagile | Deposit feeding | *Planolites montanus, Planolites* isp., *Phycodes palmatus, Glockerichnus glockeri, Halopoa* isp. |
| *Arenicolites* | Stationary | Suspension feeding and predation | *Arenicolites satheri, Arenicolites variabilis, Bergaueria* isp.,  *Halimedides* isp. |
| Deep | *Ophiomorpha-Thalassinoides* | Stationary | Suspension feeding | *Ophiomorpha nodosa,*  *Ophiomorpha* isp*., Thalassinoides* isp. |
| *Teichichnus* | Semi-vagile | Deposit feeding | *Teichichnus palmatus, T. rectus* |
| *Chondrites* | Stationary | Deposit feeding or chemosymbiosis | *Chondrites intricatus, C. recurvus* |
| Late Jurassic  (Kimmeridgian) | Clayey Sandstone Faïdja Member, Faïdja Formation (Algeria) | | Lower offshore | Shallow | *Gyrochorte* | Vagile | Deposit feeding | *Gyrochorte comosa* | Bouchemla et al. (2020) |
| *Lockeia-Protovirgularia* | Vagile to semi-vagile | Deposit feeding | *Lockeia* isp., *Protovirgularia* cf. *dichotoma* |
| *Palaeophycus* | Stationary | Suspension feeding or predation | *Palaeophycus striatus, Palaeophycus* isp. |
| Middle | *Nereites* | Vagile | Deposit feeding | *Nereites biserialis, N. uniserialis, N.* cf. *imbricata* |
| Deep | *Chondrites* | Stationary | Deposit feeding or chemosymbiosis | *Chondrites* isp. |
| Clayey Limestone Bel Aoura Member, Faïdja Formation (Algeria) | | Upper offshore | Shallow | *Planolites* | Vagile | Deposit feeding | *Planolites* isp. |
| *Palaeophycus* | Stationary | Suspension feeding or predation | *Palaeophycus* isp. |
| Middle | *Diplocraterion* | Stationary | Suspension feeding | Diplocraterion paralellum |
| Deep | *Chondrites-Zoophycos* | Stationary | Deposit feeding or chemosymbiosis | *Chondrites* cf. *targioni*, *Chondrites* isp., *Zoophycos* isp. |
| Sandy Claystone Douaouda Member, Faïdja Formation (Algeria) | | Offshore transition | Shallow | *Protovirgularia* | Vagile | Deposit feeding | *Planolites* isp., *Protovirgularia* cf. *dichotoma.* |
| Middle | *Palaeophycus* | Stationary | Suspension feeding or predation | *Palaeophycus striatus, Palaeophycus* isp. |
| Deep | *Ophiomorpha-Thalassinoides* | Stationary | Suspension feeding | *Ophiomorpha* cf. *nodosa, Thalassinoides suevicus* |
| Late Jurassic (Kimmeridgian -Tithonian) | Baisakhi Formation (India) | | Offshore transition | Shallow | *Gyrochorte-Planolites* | Vagile | Deposit feeding | *Gyrochorte comosa, G. variabilis, Planolites beverleyensis* | Borkar and Kulkarni (2006);  Pandey et al. (2014);  Pandey and Pooniya (2015) |
| Middle | *Ancorichnus- Asterosoma* | Vagile to semi-vagile | Deposit to detritus feeding | *Ancorichnus ancorichnus,*  *Asterosoma striata, Taenidium* isp. |
| *Phycodes* | Semi-vagile | Deposit feeding | *Phycodes* isp. |
| *Palaeophycus* | Stationary | Suspension feeding or predation | *Palaeophycus sulcatus* |
| Deep | *Skolithos-Arenicolites* | Stationary | Suspension feeding | *Arenicolites satheri, Skolithos linearis* |
| *Rhizocorallium-Thalassinoides* | Stationary to semi-vagile | Deposit feeding | *Rhizocorallium* isp., *Thalassinoides* isp. |
| Late Jurassic (Tithonian) | Kolar Dongar Member, Bhadasar Formation  (India) | | Upper offshore | Shallow | *Ancorichnus* | Vagile | Deposit feeding | *Ancorichnus ancorichnus, Imponoglyphus kevadiensis,*  cf. *Jamesonichnites heinbergi* | Kumar (1979);  Sudan et al. (2000);  Pandey et al. (2014);  Desai and Saklani (2014) |
| Middle | *Conichnus* | Stationary | Suspension feeding or predation | *Conichnus conicus* |
| *Rosselia* | Stationary | Detritus feeding | *Rosselia rotatus, R. socialis* |
| Deep | *Laevicyclus* | Stationary | Suspension feeding | *Laevicyclus mongraensis* |
| Offshore transition | Shallow | *Gyrochorte* | Vagile | Deposit feeding | *Gyrochorte comosa,*  *Didymaulichnus* isp. |
| Middle | *Rhizocorallium-Planolites* | Vagile to semi-vagile | Deposit feeding | *Planolites beverleyensis,*  *Rhizocorallium* isp. |
| Middle | *Teichichnus* | Semi-vagile | Deposit feeding | *Phycodes palmatus, Teichichnus rectus, T. zigzag, T. palmatus* |
| Deep | *Ophiomorpha-Palaeophycus* | Stationary | Suspension feeding or predation | *Ophiomorpha nodosa, Palaeophycus bolbiterminus, P. tubularis* |

Table DR1. Compilation of infaunal tiering structure and ichnoguilds in Middle Triassic to Late Jurassic siliciclastic offshore settings. The vast majority of ichnogenera represented in each unit is produced by different organisms with the exception of *Lockeia*-*Protovirgularia* and *Lockeia*-*Phychoplasma*, produced by bivalves, which occur together in some ichnoguilds. Another possible case is represented by *Rosselia-Cylindrichnus* and *Ancorichnus*-*Jamesonichnites*.

1 Several ichnospecies of *Selenichnites* mentioned, but poor degree of preservation suggests these may all be regarded as *Selenichnites* isp.

2 Various interpretation have been put forward for this unit, but we consider that the notion of a shallow low-energy marine setting suggested by Wignall (2001; Proc. Geol. Assoc.) essentially denotes an offshore.

3 *Aulichnites* in original paper, but now considered *Gyrochorte*.

4 *Isopodichnus* in original paper, but now considered *Gyrochorte* (Uchman, written communication, 2020).

5 Several ichnospecies of *Planolites* mentioned, but all be referred to as *Planolites* isp.

6 *Catenarichnus antarcticus in* Joseph et al. (2020)

7 *Lockeia amygdaloides* in original study

*8 Dactyloidites ottoi* in original study

9 *Muensteria* in original study

10 *Spongeliomorpha suevica* in original study

11 *Cosmoraphe* in original study

12 *Anconichnus horizontalis* in original study

Alberti, M., Fürsich, F.T., and Pandey, D.K., 2013, Deciphering condensed sequences: A case study from the Oxfordian (Upper Jurassic) Dhosa Oolite member of the Kachchh Basin, western India: Sedimentology, v. 60, p. 574–598.

Allington-Jones, L., Braddy, S.J., and Trueman, C.N., 2010, Palaeoenvironmental implications of the ichnology and geochemistry of the Westbury Formation (Rhaetian), Westbury-on-Severn, south-west England: Palaeontology, v. 53, p. 491–506.

Badve, R.M., and Ghare, M.A., 1978, Jurassic ichnofauna of Kutch-I: Biovigyanam, v. 4, p. 125–140.

Baniak, G.M., Gingras, M.K., Burns, B.A., and Pemberton, S.G., 2014, An example of a highly bioturbated, storm-influenced shoreface deposit: Upper Jurassic Ula Formation, Norwegian North Sea: Sedimentology, v. 61, p. 1261–1285.

Barras, C.G., and Twitchett, R.J., 2007, Response of the marine infauna to Triassic/Jurassic environmental change: Ichnological data from southern England: Palaeogeography, Palaeoclimatology, Palaeoecology, v. 244, p. 223–241.

Bayet-Goll, A., and De Carvalho, C.N., 2017, Differentiation of delta and open marine deposits based on an integrated ichnological and sedimentological analysis of the Late Triassic Nayband Formation, Tabas Block, Central Iran: Journal of Iberian Geology, v. 43, p. 413–437.

Belaid, M., Cherif, A., Vinn, O., and Naimi, M.N., 2020, First record of trace fossils from the Oxfordian Argiles rouges de Kheneg Formation (Tiaret, northwestern Algeria): Geologia Croatica, v. 73, p. 85–94.

Borkar, V.D., and Kulkarni, K.G., 2006, Parallel succession of ichnologic and diagenetic events from Baisakhi Formation (Kimmeridgian), Rajasthan: Current Science, v. 91, p. 429–430.

Bouchemla, I., Bendella, M., Benyoucef, M., Lagnaoui, A., Ferré, B., Scherzinger, A., and Haouz, W.B., 2020, The Upper Jurassic Faïdja Formation (Northwestern Algeria): Sedimentology, biostratigraphy and ichnology: Journal of African Earth Sciences, v. 169, 103874.

Bressan, G.S., and Palma, R., 2009, Trace fossils from the Lower–Middle Jurassic Bardas Blancas Formation, Neuquén Basin, Mendoza Province, Argentina: Acta Geological Polonica, v. 59, p. 201–220.

Buatois, L.A., Burns, F., and Ainsworth, R.B., 2013, Evaluating the role of stress factors in trace-fossil distribution along mixed-influence deltaic systems of an embayed shoreline (Middle Jurassic, Sunrise Field of the Timor Sea, Australia and Timor-Leste), *in* Keep, M., and Moss, S.J., eds., The Sedimentary Basins of Western Australia IV. Proceedings of the Petroleum Exploration Society of Australia Symposium: Petroleum Society of Australia, Perth, Australia.

Buatois, L.A., Carmona, N.B., Curran, H.A., Netto, R.G., Mángano, M.G., and Wetzel, A., 2016, The Mesozoic marine revolution, *in* Mángano, M.G., and Buatois, L.A., eds., The Trace-Fossil Record of Major Evolutionary Events, volume 2: Mesozoic and Cenozoic: Dordrecht, Netherlands, Springer, p. 19–134.

Burns, F., Buatois, L.A., and Ainsworth, R.B., 2013, Assessing controls on nearshore clastic deposition in the Plover and Elang Formations using ichnology: Case studies from the Bonaparte Basin (Timor Sea, Australia and Timor-Leste), *in* Keep, M., and Moss, S.J., eds., The Sedimentary Basins of Western Australia IV. Proceedings of the Petroleum Exploration Society of Australia Symposium: Petroleum Society of Australia, Perth, Australia.

Canale, N., Ponce, J.J., Carmona, N.B., Parada, M.N., and Drittanti, D.I., 2020, Sedimentología e icnología de un delta fluvio-dominado, Formación Lajas (Jurásico Medio), Cuenca Neuquina, Argentina: Andean Geology, v. 47, p. 179-206.

Cherif, A., Benyoucef, M., Ferré, B., and Benhamou, M., 2018, Etude sédimentologique et ichnologique de la Formation des Argiles de Saïda (Jurassique supérieur) dans les monts de Frenda (Algérie nord-occidentale): Revue de Paléobiologie, Genève, v. 37, p. 121–135.

Chiplonkar, G.W., 1980, First twelve years of palichnology in India-Presidential address, *in* Proceedings Third Indian Geological Congress, Poona, p. 1–38.

Dam, G., 1990a, Palaeoenvironmental significance of trace fossils from the shallow marine Lower Jurassic Neill Klinter Formation, East Greenland: Palaeogeography, Palaeoclimatology, Palaeoecology, v. 79, p. 221–248.

Dam, G., 1990b, Taxonomy of trace fossils from the shallow marine Lower Jurassic Neill Klinter Formation, east Greenland: Bulletin of the Geological Society of Denmark, v. 38, p. 119–144.

Darngawn, J.L., Patel, S.J., Joseph, J.K., and Shitole, A.D., 2018, Palaeoecological significance of trace fossils of Chorar Island, Eastern Kachchh Basin, Western India: Journal of the Palaeontological Society of India, v. 63, p. 169–180.

Desai, B.G., 2012, Trace fossils from Kaladongar Formation exposed in Kuar Bet, Patcham Island, Kachchh Basin, India: Journal of Paleontological Society of India, v. 57, p. 53–59.

Desai, B.G., 2016, Ichnological events associated with evolution of Kachchh rift basin Western India, *in* Thakkar, M., ed., Recent Studies on the Geology of Kachchh Volume 6: Bangalore, Geological Society of India, p. 114–128.

Desai, B.G., 2018, Mesozoic delta sedimentation Vis-à-vis ichnology of Kachchh Basin Western India: 2nd National Conference and Field Workshop on Recent Studies in Geology of Kachchh Basin, Bhuj, Kachchh University.

Desai, B.G., and Saklani, R.D., 2014, Ichnofabric analysis of the Tithonian shallow marine sediments (Bhadasar Formation) Jaisalmer Basin, India: Journal of Earth System Science, v. 123, p. 1413–1431.

Desai, B.G., Patel, S.J., Shukla, R., and Surve, D., 2008, Analysis of ichnoguilds and their significance in interpreting ichnological events: A study from Jhuran Formation (Upper Jurassic), western Kachchh: Journal of Geological Society of India, v. 72, p. 458–466.

Furlong, C.M., Gegolick, A., Gingras, M.K., González, P., Moslow, T.F., Prenoslo, D., Playter, T., and Zonneveld, J.-P., 2018, Sedimentology and ichnology of the Middle Triassic (Anisian) Sunset Prairie Formation of the Western Canada Sedimentary Basin: Bulletin of Canadian Petroleum Geology, v. 66, p. 215–236.

Fürsich, F.T., 1975, Trace fossils as environmental indicators in the Corallian of England and Normandy: Lethaia, v. 8, p. 151–172.

Fürsich, F.T., 1998, Environmental distribution of trace fossils in the Jurassic of Kachchh (Western India): Facies, v. 39, p. 243–272.

Fürsich, F.T., Oschmann, W., Singh, I.B., and Jaitly, A.K., 1992, Hardgrounds reworked concretion levels and condensed horizons in the Jurassic of western India: Their significance for basin analysis: Journal of the Geological Society, v. 149, p. 313–331.

Fürsich, F.T., Pandey, D.K., Kashyab, D., and Wilmsen, M., 2006, The trace fossil *Ctenopholeus* Seilacher & Hemleben 1966 from the Jurassic of India and Iran: Distinction from related ichnogenera: Neues Jahrbuch für Geologie und Paläontologie Monatshefte, v. 11, p. 641–654.

Fürsich, F.T., Uchman, A., Alberti, M., and Pandey, D.K., 2018, Trace fossils of an amalgamated storm-bed succession from the Jurassic of the Kachchh Basin India: The significance of time-averaging in ichnology: Journal of Palaeogeography, v. 7, p. 14–31.

Gayakvad, R.G. & Solanki, P.M., 2021, Ichnotaxonomy of the sediments of Middle-Upper Jurassic age of the Keera Dome, Kachchh, Western India. Science, Technology and Development, v. 10.

Ghare, M.A., and Kulkarni, K.G., 1986, Jurassic ichnofauna of Kutch-II: Wagad region: Biovigyanam, v. 12, p. 44–62.

Goldring, R., Taylor, A.M., and Hughes, G.W., 2005, The application of ichnofabrics towards bridging the dichotomy between siliciclastic and carbonate shelf facies: examples from the Upper Jurassic Fulmar Formation (UK) and the Jubaila Formation (Saudi Arabia): Proceedings of the Geologists’ Association, v. 116, p. 235–249.

Gurav, S.S., Kulkarni, K.G., Paranjape, A.R., and Borkar, V.D., 2014, Palaeoenvironmental implications of Middle Jurassic trace fossils from the Jaisalmer Formation India with emphasis on the ichnogenus *Asteriacites lumbricalis* von Schlotheim 1820: Annales Societatis Geologorum Poloniae, v. 84, p. 249–257.

Howard, J.D., and Singh, I.B., 1985, Trace fossils in the Mesozoic sediments of Kachchh Western India: Palaeogeography, Palaeoclimatology, Palaeoecology, v. 52, p. 99–121.

Joseph, J.K., Patel, S.J., and Bhatt, N.Y., 2012, Trace fossil assemblages in mixed siliciclastic-carbonate sediments of the Kaladongar Formation (Middle Jurassic), Patcham Island, Kachchh, Western India: Journal of the Geological Society of India, v. 80, p. 189–214.

Joseph, J.K., Patel, S.J., Darngawn, J.L., and Shitole, A.D., 2020, Ichnological analysis of Jurassic shallow to marginal marine deposits: Example from Wagad Highland, Western India: Ichnos, v. 27, p. 35–63.

Kulkarni, K.G., and Borkar, V.D., 2000, Palaeoenvironment Niches towards the Close of Deposition of Dhosa Oolite (Early Oxfordian), Kutch, India: Indian Journal of Petroleum Geology, v. 9, p. 49–58.

Kulkarni, K.G., and Ghare, M.A., 1989, Stratigraphic distribution of ichnotaxa in Wagad region, Kutch, India: Journal of the Geological Society of India, v. 33, p. 259–267.

Kulkarni, K.G., and Ghare, M.A., 1991, Locomotory traces (Repichnia) from the Jurassic sequence of Kutch, Gujarat: Journal of the Geological Society of India, v. 37, p. 374–387.

Kulkarni, K.G., Borkar, V.D., and Petare, T.J., 2008, Ichnofossils from the Fort Member (Middle Jurassic), Jaisalmer Formation, Rajasthan: Journal of the Geological Society of India, v. 71, p. 731–738.

Kumar, A., 1979, A report on the occurrence of *Gyrochorte* and other bilobed trace fossils from the Jaisalmer Formation, Rajasthan: Current Science, v. 48, p. 817–818.

Kumar, A., Bhartariya, S., and Bisht, K., 1982, Distribution of trace fossils in the Mesozoic rocks of Kutch, India: Neues Jahrbuch für Geologie und Paläontologie Monatshefte, v. 1, p. 36–40.

Leonowicz, P., 2012, Sedimentology and ichnology of Bathonian (Middle Jurassic) ore-bearing clays at Gnaszyn, Kraków-Silesia Homocline, Poland: Acta Geological Polonica, v. 62, p. 281–296.

Leonowicz, P., 2015, Ichnofabrics of shallow-marine mudstone, the result of changing environmental conditions: An example from the Middle Jurassic ore-bearing clay from southern Poland: Facies, v. 61, 11.

Macquaker, J.H.S., 1987, The depositional and diagenetic history of the Westbury Formation (Upper Triassic) in southwest Britain [Ph.D. thesis]: Bristol, University of Bristol, 216 p.

Martin, M.A., and Pollard, J.E., 1996, The role of trace fossil (ichnofabric) analysis in the development of depositional models for the Upper Jurassic Fulmar Formation of the Kittiwake Field (Quadrant 21 UKCS), *in* Hurst, A., ed., Geology of the Humber Group: Central Graben and Moray Firth, UKCS: Geological Society, London, Special Publications 114, p. 163–183.

Mørk, A., and Bromley, R.G., 2008, Ichnology of a marine regressive systems tract: The Middle Triassic of Svalbard: Polar Research, v. 27, p. 339–359.

Pandey, D.K., and Pooniya, D., 2015, Sequence stratigraphy of the Oxfordian to Tithonian sediments (Baisakhi Formation) in the Jaisalmer Basin: Volumina Jurassica, v. 13, p. 65–76.

Pandey, D.K., Choudhary, S., Bahadur, T., Swami, N., Poonia, D., and Sha, J., 2012, A review of the Lower–lowermost Upper Jurassic facies and stratigraphy of the Jaisalmer Basin, western Rajasthan, India: Volumina Jurassica, v. 10, p. 61–82.

Pandey, D.K., Fürsich, F.T., and Alberti, M., 2014, Stratigraphy and palaeoenvironments of the Jurassic rocks of the Jaisalmer Basin, *in* 9th International Congress on the Jurassic System in Jaipur, India, Field Guide: Beringeria, Special Issue 9, 111 p.

Paranjape, A.R., Kulkarni, K.G., and Gurav, S.S., 2013, Significance of *Lockeia* and associated trace fossils from the Bada Bagh Member, Jaisalmer Formation, Rajasthan: Journal of Earth System Science, v. 122, p. 1359–1371.

Patel, S.J., and Patel, N.J., 2015, Sedimentological and palaeoecological significance of the trace fossils of the Jurassic rocks of the Jhura Dome, Mainland Kachchh, western India: Volumina Jurassica, v. 13, p. 101–140.

Patel, S.J., Desai, B.G., Vaidya, A.D., and Shukla, R., 2008, Middle Jurassic trace fossils from Habo dome, Mainland Kachchh, Western India: Journal of the Geological Society of India, v. 71, p. 345–362.

Patel, S.J., Desai, B.G., and Shukla, R., 2009, Paleoecological significance of the trace fossils of Dhosa Oolite Member (Jumara Formation), Jhura dome, Mainland Kachchh, Western India: Journal of the Geological Society of India, v. 74, p. 601–614.

Patel, S.J., Nenuji, V., and Joseph, J.K., 2012, Trace fossils from the Jurassic rocks of Gangta Bet, eastern Kachchh, Western India: Journal of the Palaeontological Society of India, v. 57, p. 59–73.

Pienkowski, G., 1991, Eustatically-controlled sedimentation in the Hettangian-Sinemurian (Early Jurassic) of Poland and Sweden: Sedimentology, v. 38, p. 503–518.

Schwarz, E., Poyatos-Moré, M., Boya, S., Gomis-Cartesio, L., and Midtkandal, I., 2021, Architecture and controls of thick, intensely bioturbated, storm-influenced shallow-marine successions: An example from the Jurassic Neuquén Basin (Argentina): Palaeogeography, Palaeoclimatology, Palaeoecology, v. 562, 110109.

Shringarpure, D.M., 1985, Ichnological studies of the rocks exposed between Chitrod and Manfara, eastern Kutch, Gujarat State [Ph.D. thesis]: Vadodara, The Maharaja Sayajirao University of Baroda, 397 p.

Solanki, P.M., Bhatt, N.Y., Patel, S.J., and Patel, J.M., 2017, Ichnology of the Callovian-Oxfordian rocks of the Katrol hill range, Kachchh, western India: Journal of the Geological Society of India, v. 90, p. 396–404.

Srivastava, D.K., Singh, M.P., and Kulshrestha, A.K., 2010, The trace fossil *Dactyloidites* Hall, 1886 from the Middle Jurassic Khadir Formation of Bela Island, Kachchh, India and its palaeoenvironmental significance: Journal of the Palaeontological Society of India, v. 55, p. 171–175.

Sudan, C.S., Sahni, A.K., and Sharma, U.K., 2000, Trace fossils from the Jurassic sequence of Jaisalmer basin, Rajasthan: Journal of the Palaeontological Society of India, v. 45, p. 165–171.

Swift, A., and Duffin, C.J., 1999, Trace fossils, *in* Swift, A., and Martill, D.M., eds., Fossils of the Rhaetian Penarth Group: The Palaeontological Association Field Guides to Fossils 9, p. 239-250.

Uchman, A., 1991, *Isopodichnus* and other trace fossils from marine Kopieniec Formation (Rhaetian–Sinemurian) in the Tatra MTS., Poland: Geologica Carpathica, v. 42, p. 117–121.

Wang, G., 1993, Xiphosurid trace fossils from the Westbury Formation (Rhaetian) of south-west Britain: Palaeontology, v. 36, p. 111–122.

Wignall, P.B., 2001, Sedimentology of the Triassic–Jurassic boundary beds in Pinhay Bay (Devon, SW England): Proceedings of the Geologists’ Association, v. 112, p. 349–360.
